# Supplementary material for: Synthesis and characterization of an IrO2–Fe2O3 electrocatalyst for the hydrogen evolution reaction in acidic water electrolysis
Source: Royal Society of Chemistry journal article supplement (doi:10.1039/c7ra01533j), 2017-01-01
Supplement: c7ra01533j1.pdf [file c7ra01533j1.pdf]

## Supporting information

### **Synthesis and characterization of IrO<sub>2</sub>-Fe<sub>2</sub>O<sub>3</sub> electrocatalyst for the hydrogen evolution reaction in acidic water electrolysis**

Xian Yang, Yande Li, Li Deng, Wenyang Li, Zhandong Ren, Ming Yang, Xiaohong Yang and Yuchan Zhu\*

School of Chemical and Environmental Engineering, Wuhan Polytechnic University, Wuhan, 430023, P. R. China.

E-mail: zhuyuchan@163.com;

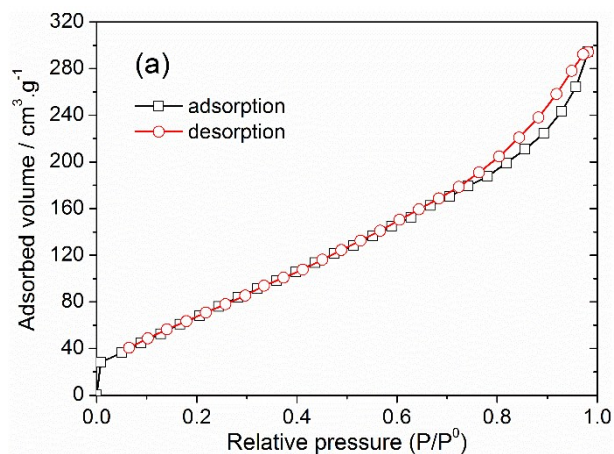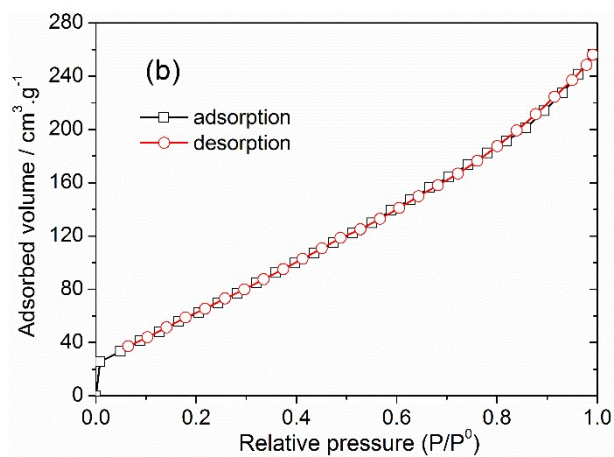

Fig. S1† The N<sub>2</sub> adsorption/desorption isotherms of IrO<sub>2</sub>-Fe<sub>2</sub>O<sub>3</sub> composite oxide (a) and IrO<sub>2</sub> (b).

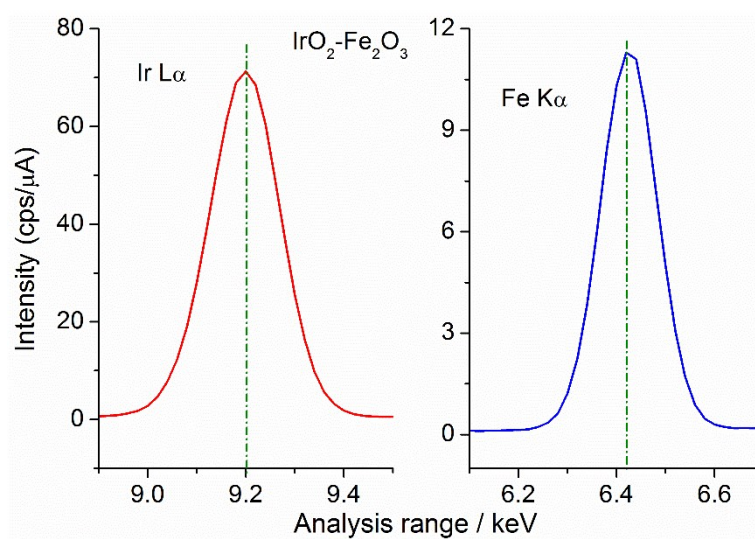

Fig. S2† The X-ray fluorescence spectrometry of Ir and Fe in IrO<sub>2</sub>-Fe<sub>2</sub>O<sub>3</sub> composite oxide

Table S1† The composition analysis of IrO<sub>2</sub>-Fe<sub>2</sub>O<sub>3</sub> composite oxide by X-ray fluorescence

| Analyte                                                                              | Atom% | Anal.(keV) | Line |
|--------------------------------------------------------------------------------------|-------|------------|------|
| IrO <sub>2</sub> -Fe <sub>2</sub> O <sub>3</sub> before 600 cycles of CV measurement |       |            |      |
| Ir                                                                                   | 88.39 | 8.9 - 9.4  | IrLa |
| Fe                                                                                   | 11.61 | 6.2 - 6.6  | FeKa |
| IrO <sub>2</sub> -Fe <sub>2</sub> O <sub>3</sub> after 600 cycles of CV measurement  |       |            |      |
| Ir                                                                                   | 89.62 | 8.9 - 9.4  | IrLa |
| Fe                                                                                   | 10.38 | 6.2 - 6.6  | FeKa |

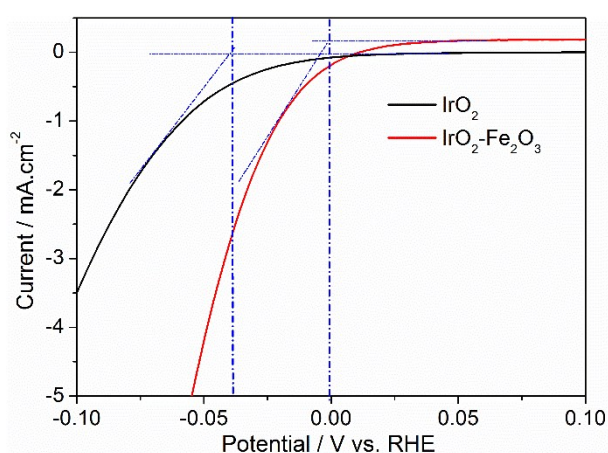

Fig. S3† The onset potential of Linear sweep voltammetry curves of IrO<sub>2</sub>-Fe<sub>2</sub>O<sub>3</sub> (red line) and IrO<sub>2</sub> (black line) electrodes in 0.5 mol·L<sup>-1</sup> H<sub>2</sub>SO<sub>4</sub> solution at a sweeping rate of 5 mV·s<sup>-1</sup>.

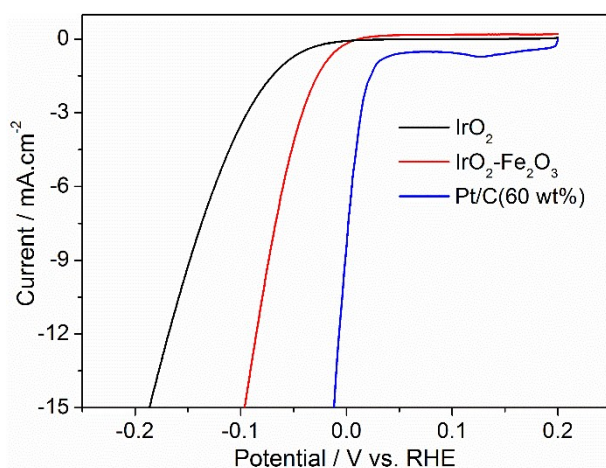

Fig. S4† Linear sweep voltammetry curves of IrO<sub>2</sub>-Fe<sub>2</sub>O<sub>3</sub> (red line), IrO<sub>2</sub> (black line) and Pt/C (blue line, 60wt%, Johnson Matthey) electrodes in 0.5 mol·L<sup>-1</sup> H<sub>2</sub>SO<sub>4</sub> solution at a sweeping rate of 5 mV·s<sup>-1</sup> in geometric surface area (GSA).

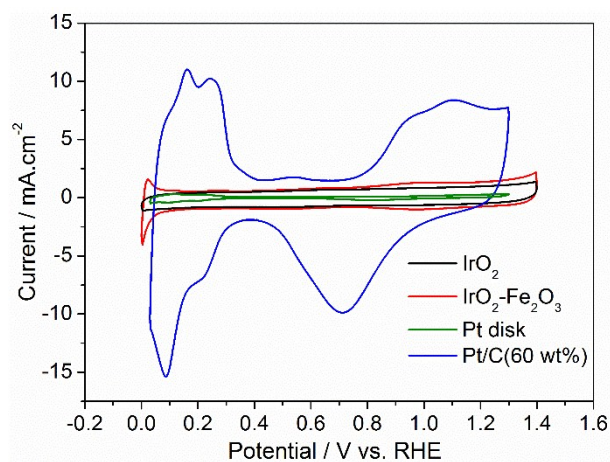

Fig. S5† Cyclic voltammograms in  $0.5 \text{ mol}\cdot\text{L}^{-1} \text{H}_2\text{SO}_4$  solution at a sweeping rate of  $100 \text{ mV}\cdot\text{s}^{-1}$  for  $\text{IrO}_2\text{-Fe}_2\text{O}_3$  (red line),  $\text{IrO}_2$  (black line), Pt disk (green line) and Pt/C (blue line, 60wt%, Johnson Matthey) electrodes in geometric surface area (GSA).

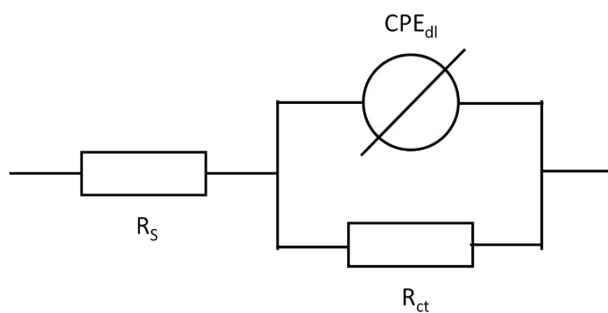

Fig. S6† The equivalent circuit of the impedance of  $\text{IrO}_2\text{-Fe}_2\text{O}_3$  and  $\text{IrO}_2$  electrodes

Table S2† Impedance parameters of  $\text{IrO}_2\text{-Fe}_2\text{O}_3$  and  $\text{IrO}_2$  electrodes obtained by fitting the experimental data to  $R_s(R_{ct}C_{dl})$  equivalent circuit

| Electrocatalyst                      | $R_s$<br>/ $\Omega\cdot\text{cm}^2$ | $R_{ct}$<br>/ $\Omega\cdot\text{cm}^2$ | $C_{dl}$<br>/ $\text{mF}\cdot\text{cm}^{-2}$ | $n_{dl}$ |
|--------------------------------------|-------------------------------------|----------------------------------------|----------------------------------------------|----------|
| $\text{IrO}_2$                       | 11.57                               | 693.2                                  | 1.38                                         | 0.8623   |
| $\text{IrO}_2\text{-Fe}_2\text{O}_3$ | 9.724                               | 232.7                                  | 3.05                                         | 0.9385   |

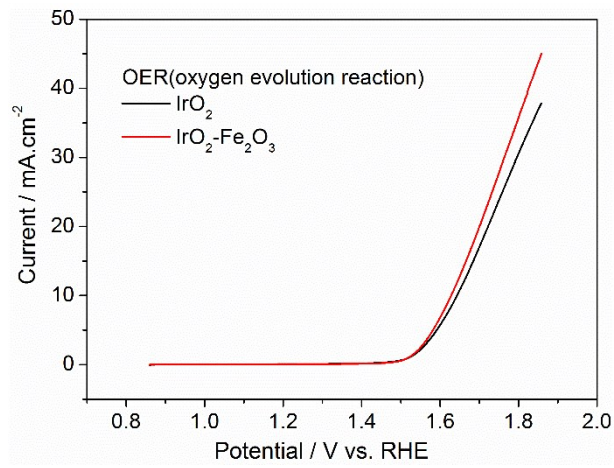

Fig. S7† Linear sweep voltammetry curves of IrO<sub>2</sub>-Fe<sub>2</sub>O<sub>3</sub> (red line) and IrO<sub>2</sub> (black line) electrodes in 0.5 mol·L<sup>-1</sup> H<sub>2</sub>SO<sub>4</sub> solution at a sweeping rate of 5 mV·s<sup>-1</sup> in geometric surface area (GSA).
